# Supplementary material for: From Investigating a Case of Cellulitis to Exploring Nosocomial Infection Control of ST1 <em>Legionella pneumophila</em> Using Genomic Approaches
Source: Preprints.org preprint supplement (doi:10.20944/preprints202404.0136.v1), 2024-04-02
Supplement: Supplementary file 1 [file supplementary]

## Sheet: Sheet1
Key	SBT ST	C/E	Year	Location	Country	Cluster assigned by cgMLST	Cluster assigned by wgMLST	core_PercentCalled	wgMLST loci_PercentCalled	wgMLST loci_NrAlleles	GC content (%)	AvgQuality	AvgReadCoverage	AvgQualityTrimmed	AvgReadCoverageTrimmed	N50	NrContigs	AvgDeNovoCover	Length	NrBasesN	NrNonACGT
AH104	ST1	Environmental	2006	China	China	8	13	100	51.9411	2997	38.4	37	115	37	114	184613	46	112	3545934	2194	96
BJ-23	ST1	Environmental	2006	China	China	5	7	100	52.8943	3052	38.2	37	114	37	114	178414	52	108	3663699	2033	111
CL18-200043	ST1	Environmental	2018	USA	USA	23	8	100	51.6291	2979	39.3	35	137	35	136	177182	58	128	3547371	806	111
CL18-200044	ST1	Environmental	2018	USA	USA	23	8	100	51.3345	2962	39.4	35	137	35	136	132018	65	131	3473522	1323	81
CL18-200045	ST1	Environmental	2018	USA	USA	11	23	100	51.2998	2960	39.3	34	150	34	148	177182	51	140	3466895	427	80
CL18-200046	ST1	Environmental	2018	USA	USA	23	8	100	51.6638	2981	39.2	36	165	36	165	183481	52	160	3546152	772	125
EUL82	ST1	Clinical	1994	Denmark	Denmark	14	14	100	51.6118	2978	38.1	36	87	35	99	182892	52	95	3564355	297	161
EUL84	ST1	Clinical	1995	Denmark	Denmark	14	14	100	49.948	2882	38	36	92	35	104	184504	52	104	3434038	182	137
EUL85	ST1	Clinical	1995	Denmark	Denmark	14	14	100	51.6984	2983	38.1	35	119	35	139	182892	54	133	3564841	318	146
EUL88	ST1	Clinical	1995	Denmark	Denmark	14	14	100	51.5251	2973	38.1	37	101	36	118	182892	57	113	3563878	224	149
EUL93	ST1	Clinical	1992	Denmark	Denmark	14	14	100	52.3744	3022	38.1	37	72	36	83	159887	58	78	3628375	354	168
H103120165	ST1	Clinical	2010	UK	United Kingdom	13	12	100	52.1317	3008	40	37	86	37	83	124756	71	80	3577212	2655	164
H103340763	ST1	Environmental	2010	UK	United Kingdom	13	12	100	52.1144	3007	39.3	38	123	38	122	137789	64	118	3577370	1800	120
H104720329	ST1	Clinical	2010	UK	United Kingdom	12	6	100	52.0451	3003	40.1	37	79	37	78	128852	68	76	3575342	3126	165
H104780626	ST1	Environmental	2010	UK	United Kingdom	12	6	100	52.0451	3003	40.2	37	84	37	82	137749	62	80	3575962	3100	148
JX1	ST1	Environmental	2008	China	China	7	30	100	52.9289	3054	38.2	37	115	37	114	178236	48	109	3650475	1647	107
KI-684	ST1	Environmental	2010	Japan	Japan	17	15	100	51.7504	2986	36.8	36	23	32	194	211720	46	168	3655454	331	30
Kl-464	ST1	Environmental	2008	Japan	Japan	5	25	100	53.0676	3062	36.3	36	15	32	146	194092	41	128	3554588	329	46
Kl-497	ST1	Environmental	2008	Japan	Japan	17	15	100	52.3917	3023	36.2	36	18	32	168	219325	45	145	3651867	347	51
Kl-649	ST1	Environmental	2010	Japan	Japan	5	25	100	33.8648	1954	21.5	36	34	32	185	194092	42	161	3608165	272	46
Kl-736	ST1	Environmental	2011	Japan	Japan	17	15	100	53.0329	3060	36.7	36	15	32	139	177464	47	119	3687184	438	48
LEG1090	ST1	Clinical	2020	Hospital 2 Clinical and Environment	Belgium	27	21	100	52.4783	3028	38.5	35	1051	35	1036	178388	57	182	3651875	241	93
LEG1091	ST1	Environmental	2020	Hospital 2 Clinical and Environment	Belgium	27	21	100	52.4957	3029	38.6	35	1445	35	1426	178388	56	181	3651252	301	93
LEG1092	ST1	Environmental	2020	Hospital 2 Clinical and Environment	Belgium	27	21	100	52.513	3030	38.6	35	1270	35	1252	178388	57	181	3652005	733	113
LEG1094	ST1	Clinical	2020	Hospital 2 Clinical and Environment	Belgium	27	21	100	52.4957	3029	38.2	33	930	33	905	198645	57	148	3651721	656	103
LEG1095	ST1	Environmental	2020	Hospital 2 Clinical and Environment	Belgium	27	21	100	52.4783	3028	38.3	33	998	33	971	198645	53	151	3650434	587	103
LEG1096	ST1	Environmental	2020	Hospital 2 Clinical and Environment	Belgium	27	21	100	52.4437	3026	38.2	33	963	33	940	178388	55	150	3651333	718	108
LEG1114	ST1	Clinical	2019	Patient 1	Belgium	1	1	100	52.3224	3019	38	33	430	33	419	192993	49	150	3584832	292	97
LEG1115	ST1	Clinical	2019	Patient 1	Belgium	1	1	100	50.4679	2912	38.3	33	430	33	18	192993	49	186	3455944	408	476
LEG1116	ST1	Clinical	2019	Patient 1	Belgium	1	1	100	52.3744	3022	38.1	33	430	33	422	192737	51	151	3442923	222	56
LEG1117	ST1	Clinical	2019	Patient 1	Belgium	1	1	100	51.9931	3000	38.1	33	430	32	12	178391	49	185	3584999	285	521
LEG1121	ST1	Environmental	2019	Patient 1 Environment	Belgium	1	1	100	52.0971	3006	38.2	33	430	33	15	178391	49	184	3585236	345	558
LEG1122	ST1	Environmental	2019	Patient 1 Environment	Belgium	1	1	100	50.4333	2910	38.3	33	430	33	15	192992	49	182	3455580	436	518
LEG1234	ST1	Clinical	2020	Patient 2	Belgium	1	1	100	52.3397	3020	39.1	35	430	35	417	178391	50	188	3619020	531	91
LEG1235	ST1	Environmental	2020	Patient 2 Environment	Belgium	1	1	100	50.8146	2932	39.8	35	430	35	410	192993	50	196	3456437	207	92
LEG1236	ST1	Environmental	2020	Patient 2 Environment	Belgium	1	1	100	50.8146	2932	39.1	35	430	35	419	192993	46	197	3455699	599	88
LEG321	ST1	Clinical	2003	Hospital 4 Clinical	Belgium	1	1	100	52.461	3027	38.4	35	303	35	302	192993	47	183	3591962	307	85
LEG323	ST1	Clinical	2004	Hospital 4 Clinical	Belgium	1	1	100	52.3917	3023	38.3	34	278	34	263	178391	50	186	3585610	335	79
LEG325	ST1	Clinical	2004	Sporadic	Belgium	18	16	100	50.7279	2927	38.3	36	370	36	362	141625	55	193	3457368	219	13
LEG393	ST1	Clinical	2011	Sporadic	Belgium	27	2	100	52.1664	3010	40.1	36	708	36	671	168307	48	193	3575383	207	93
LEG508	ST1	Environmental	1985-87	Hospital 3 Clinical and Environment	Belgium	18	16	100	51.7678	2987	39.3	32	201	33	188	133262	58	175	3535462	305	72
LEG509	ST1	Environmental	1985-87	Hospital 3 Clinical and Environment	Belgium	18	16	100	51.8024	2989	38.6	33	467	33	447	133262	61	186	3534795	300	72
LEG510	ST1	Clinical	1985-87	Hospital 3 Clinical and Environment	Belgium	18	16	100	50.7626	2929	39.6	32	124	33	115	142474	60	106	3460810	552	84
LEG511	ST1	Clinical	1985-87	Hospital 3 Clinical and Environment	Belgium	18	16	100	51.8024	2989	39.6	32	87	33	79	142474	55	74	3535320	766	91
LEG512	ST1	Clinical	1985-87	Hospital 3 Clinical and Environment	Belgium	18	16	100	51.7678	2987	38.6	33	480	33	457	133262	58	187	3533990	259	81
LEG514	ST1	Clinical	1985-87	Hospital 3 Clinical and Environment	Belgium	18	16	100	50.7626	2929	38.4	36	207	36	204	141758	62	197	3451984	253	72
LEG515	ST1	Clinical	1985-87	Hospital 3 Clinical and Environment	Belgium	1	1	100	52.3917	3023	38.4	36	230	36	226	192993	49	190	3586224	173	78
LEG516	ST1	Clinical	1985-87	Hospital 3 Clinical and Environment	Belgium	18	16	100	51.7851	2988	38.3	36	228	36	224	133262	60	192	3535808	268	69
LEG517	ST1	Clinical	1985-87	Hospital 3 Clinical and Environment	Belgium	18	16	100	50.7972	2931	38.4	36	219	36	215	141758	58	197	3460480	328	65
LEG519	ST1	Clinical	1985-87	Hospital 3 Clinical and Environment	Belgium	18	16	100	51.8024	2989	38.4	35	243	36	239	133262	59	193	3535886	297	68
LEG521	ST1	Clinical	1985-87	Hospital 3 Clinical and Environment	Belgium	18	16	100	50.7972	2931	38.4	36	204	36	201	141758	63	197	3462039	418	70
LEG522	ST1	Clinical	1985-87	Hospital 3 Clinical and Environment	Belgium	18	16	100	51.7504	2986	38.4	36	171	36	168	133262	61	162	3535592	651	65
LEG563	ST1	Clinical	2015	Sporadic Nosocomial	Belgium	16	11	100	52.9463	3055	38.7	35	904	35	878	177082	60	188	3670646	244	105
LEG723	ST1	Environmental	2016	Sporadic environmental sampling (Hospital 3)	Belgium	18	16	100	50.7626	2929	38.3	37	143	37	141	141904	58	139	3461238	633	77
LEG767	ST1	Clinical	2017	Sporadic	Belgium	1	1	100	52.3224	3019	38.2	37	153	37	150	192737	40	142	3577992	192	33
LEG772	ST1	Clinical	2017	Sporadic	Belgium	15	3	100	52.305	3018	38.3	37	159	37	157	184679	44	148	3572490	234	26
LG10143009	ST1	Clinical	2010	France	France	29	17	100	49.9307	2881	37.4	37	376	37	376	168163	53	203	3444034	1445	103
LG10191002	ST1	Clinical	2010	France	France	30	29	100	51.5945	2977	37.5	37	789	37	788	168241	59	195	3575304	1096	99
LG10203012	ST1	Environmental	2010	France	France	30	29	100	51.5945	2977	37.4	37	1074	37	1074	168163	60	195	3575352	1247	99
LG11011012	ST1	Environmental	2010	France	France	30	29	100	51.7158	2984	37.1	37	677	37	677	168163	62	193	3628105	1908	104
LG11054025	ST1	Environmental	2011	France	France	28	26	100	50.6759	2924	37.4	37	484	37	484	137810	66	200	3430425	286	82
Lp-2002694P8	ST1	Environmental	2012	Israel	Israel	21	17	100	52.0624	3004	38.6	37	84	37	83	178380	43	81	3575602	1731	110
Lp-282-1	ST1	Environmental	2013	Israel	Israel	19	4	100	51.5078	2972	38.5	37	86	38	85	231143	64	82	3547603	1719	133
Lp-283	ST1	Environmental	2013	Israel	Israel	25	24	100	50.5026	2914	38.6	37	48	37	48	168051	51	46	3440535	1498	116
Lp-286-1	ST1	Environmental	2013	Israel	Israel	25	28	100	52.3224	3019	38.7	37	145	37	145	168310	53	139	3584494	637	170
LP06	ST1	Environmental	2013	Australia	Australia	9	9	100	52.2877	3017	38	36	444	36	425	168170	104	192	3602490	173	528
LP11	ST1	Environmental	2013	Australia	Australia	9	27	100	53.2756	3074	38	36	464	36	449	137788	56	190	3638013	322	104
LP18	ST1	Environmental	2013	Australia	Australia	9	27	100	53.2756	3074	38	36	413	36	398	137771	54	187	3627905	148	78
LP46	ST1	Clinical	2013	Australia	Australia	26	22	100	53.2062	3070	38.2	36	402	37	393	128739	95	185	3659170	300	81
LP47	ST1	Clinical	2013	Australia	Australia	9	9	100	52.2357	3014	38.3	36	391	37	383	168170	116	192	3602682	920	553
N_Leg111	ST1	Clinical	2014	Norway	Norway	21	17	100	52.253	3015	39.7	33	253	34	234	168307	58	188	3577515	821	76
N_Leg115	ST1	Clinical	2015	Norway	Norway	7	2	100	52.8076	3047	39.87	33	185	33	170	173517	55	153	3597933	393	79
N_Leg119	ST1	Clinical	2015	Norway	Norway	21	17	100	50.6586	2923	39.7	33	219	33	204	152216	55	194	3446511	364	68
N_Leg120	ST1	Clinical	2015	Norway	Norway	22	19	100	53.1196	3065	39.4	33	178	33	164	177182	59	148	3613646	1138	79
Qin1	ST1	Environmental	2008	China	China	17	15	100	53.0676	3062	38.1	36	209	36	207	176914	54	190	3646610	1270	101
ZJ050052	ST1	Environmental	2006	China	China	10	20	100	53.6049	3093	38.2	37	115	37	114	168163	64	108	3663879	1994	192
Avg: average
Nr: number of
Percent: percentage
